# Supplementary material for: A redox-activated fluorescence switch based on a ferrocene–fluorophore–boronic ester conjugate
Source: Royal Society of Chemistry journal article supplement (doi:10.1039/c4cc07891h), 2014-11-25
Supplement: c4cc07891h1.pdf [file c4cc07891h1.pdf]

*Electronic Supplementary Information (ESI)*

**A redox-activated fluorescence switch based on a Ferrocene  
– fluorophore – boronic ester conjugate**

Meng Li,<sup>a</sup> Zhiqian Guo,<sup>b</sup> Weihong Zhu,<sup>b\*</sup> Frank Marken,<sup>a\*</sup> and Tony James<sup>a\*</sup>

<sup>a</sup>Department of Chemistry, University of Bath, Claverton Down Fax: 44 1225 386231; Tel: 44 1225 386627; E-mail: t.d.james@bath.ac.uk; F.Marken@bath.ac.uk.

<sup>b</sup>Shanghai Key Laboratory of Functional Materials Chemistry, Key Laboratory for Advanced Materials and Institute of Fine Chemicals, East China University of Science & Technology, Shanghai 200237, P. R. China. E-mail: whzhu@ecust.edu.cn

**Table of contents**

1. General methods and characterization of FNB
2. Fluorescent test of FNB for L-Ascorbic acid Sodium salt (LAS)
3. Fluorescent test of FNB for fluoride
4. Fluorescent test of 20  $\mu\text{M}$  FNB for  $\text{Fe}^{3+}$  titration in presence of 20  $\mu\text{M}$   $\text{F}^-$
5. Fluorescent test of 2 for  $\text{Fe}^{3+}$  with and without  $\text{F}^-$
6. Proposed schematic mechanism on PET and fluoride binding process and logic symbol schemes
7. Conjugating the FNB with polymeric carbohydrates
8. Fluorescent test of FNB for  $\text{Fe}^{3+}$ ,  $\text{F}^-$  and L-Ascorbic acid Sodium salt (LAS)
9. pH titration of FNB
10. pH titration of FNB with 50 mM fructose
11. Electrochemical studies on detection of fluoride
12. Electrochemical studies on different anions
13.  $^1\text{H}$  NMR and  $^{13}\text{C}$  NMR spectra

## 1. General Methods

All chemical reagents and solvents were analytical grade and purchased from commercial suppliers. Compound **FNB** were prepared by the established literature procedure.<sup>1</sup> <sup>1</sup>H NMR and <sup>13</sup>C NMR spectra were recorded on the Bruker AV-300 spectrometer with chemical shifts reported in ppm (in CDCl<sub>3</sub>, TMS as internal standard) at room temperature. Electrospray mass spectra were recorded using a Bruker micro TOF spectrometer using reserpine as calibrant.

Fluorescence measurements were performed on a Perkin Elmer Luminescence spectrophotometer LS 50B, utilising sterna silica (quartz) cuvettes with 10 mm path length and four sides polished. Spectral-grade solvents were used for measurements of fluorescence.

For voltammetry studies a microAutolab III potentiostat system (EcoChemie, Netherlands) was employed with a glassy carbon counter electrode and a KCl-saturated Calomel (SCE) reference electrode (Radiometer). The working electrode was a 4.9 mm diameter basal plane pyrolytic graphite (Le Carbone UK Ltd., Pyrocarbon) disc electrode mounted in Teflon. The temperature during experiments was  $15 \pm 2$  °C.

### 2-ferrocenylmethyl-6-(piperazin-1-yl)-1H-benzo[de]isoquinoline-1,3(2H)-dione

6-(piperazin-1-yl)benzo[de]isochromene-1,3-dione (0.37 g, 1.30 mmol) and Ferrocenylmethylamine (0.37 g, 1.72 mmol) were added into 30 mL ethanol. The mixture was refluxed for 5 h under a nitrogen atmosphere. After completion of the reaction, the solvent was removed in vacuo and the residue was purified with column chromatography (silica gel, DCM–MeOH, 1:1, v/v), and an orange solid was obtained (100 mg, 16%). <sup>1</sup>H NMR (300 MHz, CDCl<sub>3</sub>, ppm):  $\delta$  8.45 (d, *J* = 9.0 Hz, 1H), 8.39 (d, *J* = 8.5 Hz, 2H), 7.76 (t, *J* = 7.5 Hz, 1H), 7.27 (d, *J* = 8.2 Hz, 1H), 4.95 (s, 2H), 4.32 (t, *J* = 1.8 Hz, 2H), 4.20 (s, 5H), 4.05 (t, *J* = 1.8 Hz, 2H), 3.13 (d, *J* = 2.8 Hz, 4H), 2.99 (d, *J* = 4.5 Hz, 4H). <sup>13</sup>C NMR (75 MHz, CDCl<sub>3</sub>, ppm):  $\delta$  163.6, 163.0, 156.6, 132.8, 131.1, 129.4, 126.3, 125.6, 122.7,

115.4, 115.3, 83.8, 70.0, 68.8, 67.9, 54.1, 45.8. HRMS (ESI  $\mu$ TOF)  $m/z$  calcd for  $C_{27}H_{25}N_3O_2Fe$   $[M + Na]^+$  502.1194, found 502.1203.

**2-ferrocenylmethyl-6-(4-(2-(4,4,5,5-tetramethyl-1,3,2-dioxaborolan-2-yl)benzyl)piperazin-1-yl)-1H-benzo[de]isoquinoline-1,3(2H)-dione(FNB)**

2-ferrocenylmethyl-6-(piperazin-1-yl)-1H-benzo[de]isoquinoline-1,3(2H)-dione (70mg, 0.15 mmol) and 2-(2-(bromomethyl)phenyl)-4,4,5,5-tetramethyl-1,3,2-dioxaborolane (43.4 mg, 0.16 mmol) were dissolved in anhydrous acetonitrile. And  $K_2CO_3$  (62.2 mg, 0.45 mmol) was added and the mixture was refluxed overnight. After completion of the reaction, most of the acetonitrile was evaporated and the residue was poured into water to give the precipitate (70 mg, 67%).  $^1H$  NMR (300 MHz,  $CDCl_3$ , ppm):  $\delta$ H 8.45 (dd,  $J_1 = 7.3$  Hz,  $J_2 = 1.1$  Hz, 1H), 8.37 (t,  $J = 8.2$  Hz, 2H), 7.69 – 7.66 (m, 1H), 7.65 – 7.63 (m, 1H), 7.38 (dd,  $J_1 = 7.3$  Hz,  $J_2 = 1.5$  Hz, 1H), 7.33 – 7.25 (m, 2H), 7.16 (d,  $J = 8.2$  Hz, 1H), 5.00 (s, 2H), 4.38 (t,  $J = 1.8$  Hz, 2H), 4.20 (s, 5H), 4.06 (t,  $J = 1.8$  Hz, 2H), 3.77 (s, 2H), 3.18 (s, 4H), 2.69 (t,  $J = 4.6$  Hz, 4H), 1.36 (s, 12H).  $^{13}C$  NMR (75 MHz,  $CDCl_3$ , ppm):  $\delta$ C 163.6, 163.0, 156.0, 143.9, 135.0, 132.7, 131.1, 131.0, 130.3, 129.5, 129.4, 126.8, 126.4, 125.5, 122.8, 115.6, 115.3, 83.8, 83.4, 70.0, 69.0, 67.9, 61.6, 52.9, 52.7, 25.2. HRMS (ESI  $\mu$ TOF)  $m/z$  calcd for  $C_{40}H_{42}N_3O_4BFe$   $[M + Na]^+$  718.2515, found 718.2559.

**Reference**

1. W. Zhu, L. Song, Y. Yang and H. Tian, *Chemistry-A European Journal*, 2012, 18, 13388-13394.

## 2. fluorescent Test of FNB for L-Ascorbic acid Sodium salt (LAS)

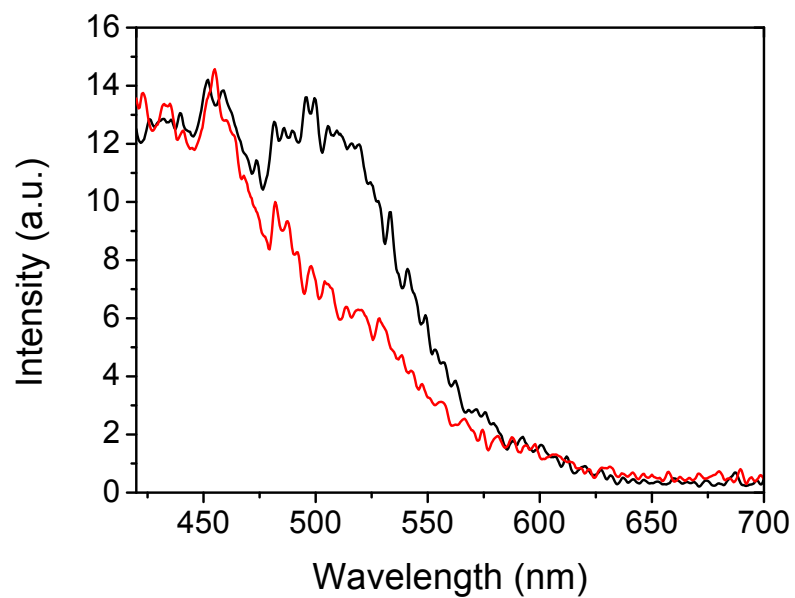

**Figure S1.** Emission spectra of FNB (10  $\mu\text{M}$ ) in THF upon titration of L-Ascorbic acid Sodium salt (LAS) by  $\lambda_{\text{ex}} = 403$  nm (0, 10.0 equiv.)

### 3. Fluorescent test of FNB for fluoride

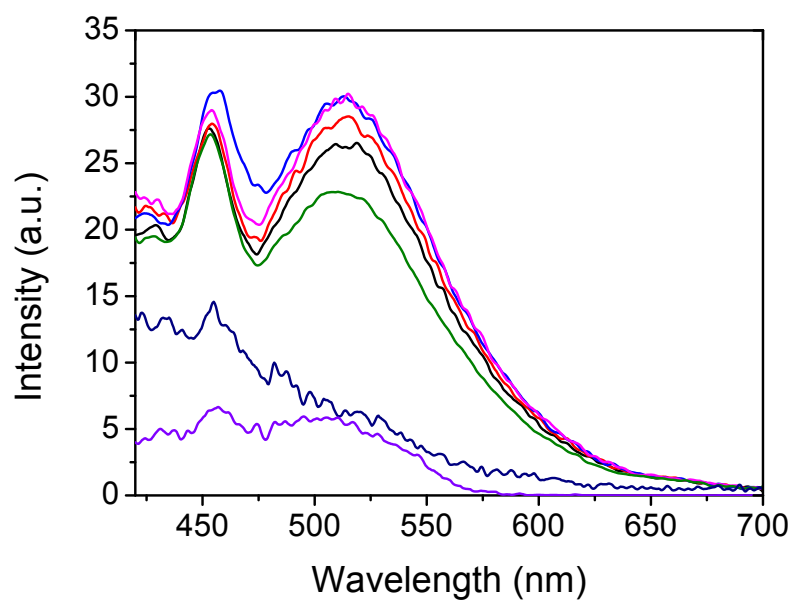

**Figure S2.** Emission spectra of FNB (10  $\mu\text{M}$ ) in THF upon titration of  $\text{F}^-$  by  $\lambda_{\text{ex}} = 403$  nm (0, 1, 3, 5, 7, 8, 10.0 equiv.)

4. Fluorescent test of 20  $\mu\text{M}$  FNB for  $\text{Fe}^{3+}$  titration in presence of 20  $\mu\text{M}$   $\text{F}^-$

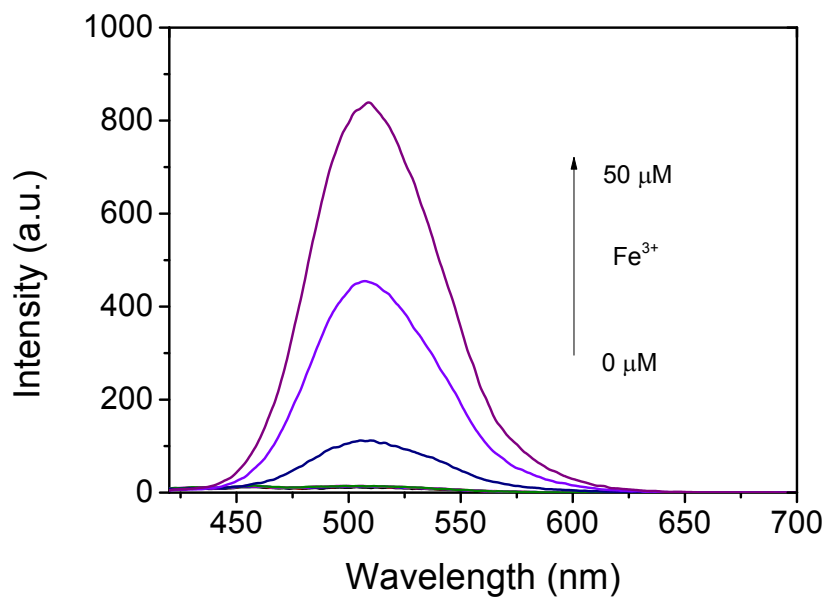

**Figure S3.** Fluorescent spectra of **FNB** (THF, 20  $\mu\text{M}$ ,  $\lambda_{\text{ex}} = 403$  nm) in the presence of 20  $\mu\text{M}$   $\text{F}^-$  upon the addition of various  $\text{Fe}^{3+}$  (0, 2, 5, 10, 20, 30, 50  $\mu\text{M}$ )

## 5. Fluorescent test of **2** for $\text{Fe}^{3+}$ with and without $\text{F}^-$

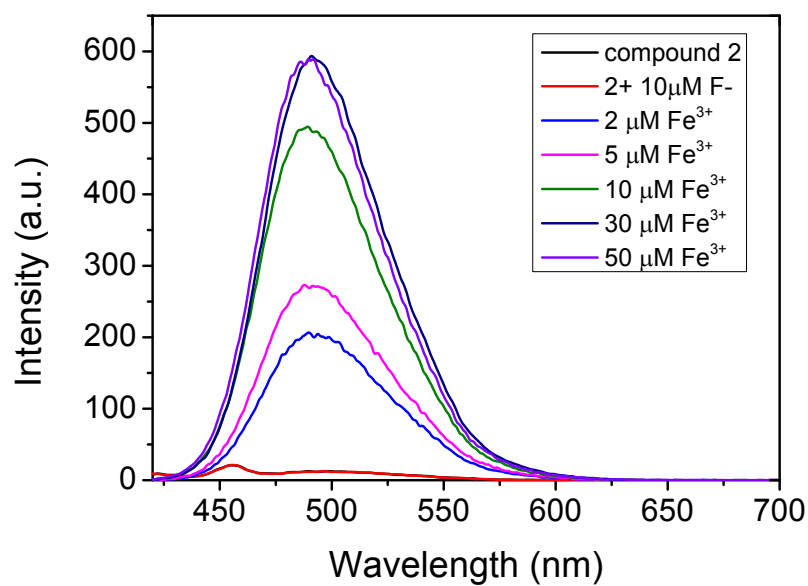

**Figure S4.** Fluorescent spectra of **2** (THF, 10  $\mu\text{M}$ ,  $\lambda_{\text{ex}} = 403$  nm) and **2** with 10  $\mu\text{M}$   $\text{F}^-$  upon the addition of various  $\text{Fe}^{3+}$  (0, 2, 5, 10, 30, 50  $\mu\text{M}$ )

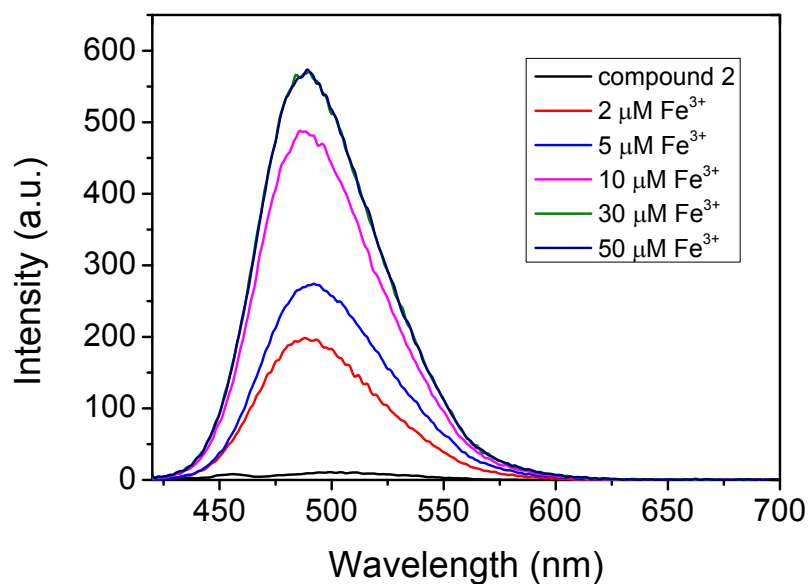

**Figure S5.** Fluorescent spectra of **2** (THF, 10  $\mu\text{M}$ ,  $\lambda_{\text{ex}} = 403$  nm) upon the addition of various  $\text{Fe}^{3+}$  (0, 2, 5, 10, 30, 50  $\mu\text{M}$ )

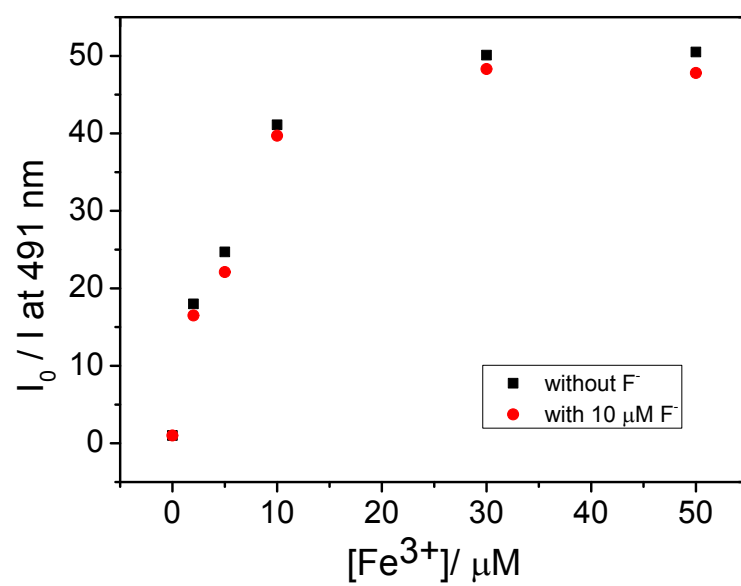

**Figure S6.** The values of  $I/I_0$  at 491 nm upon the addition of various  $\text{Fe}^{3+}$  (0, 2, 5, 10, 30, 50  $\mu\text{M}$ ) with and without 10 $\mu\text{M}$   $\text{F}^-$



**6. Proposed schematic mechanism on PET and fluoride binding process and logic symbol schemes.**

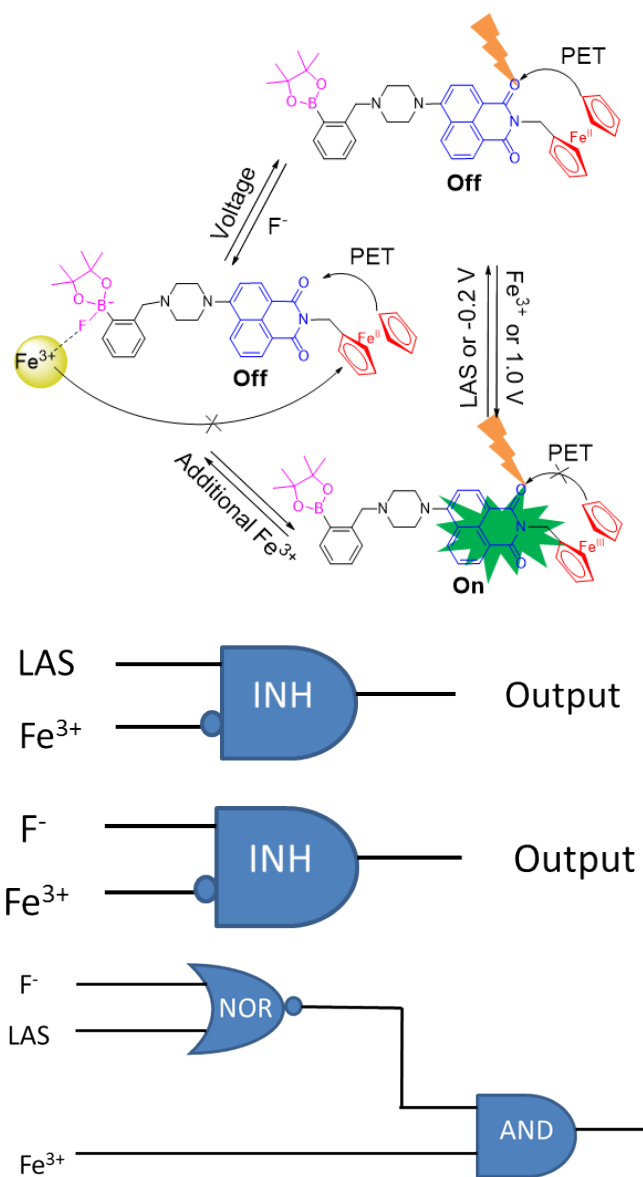

**Figure S7.** Proposed schematic mechanism on PET and fluoride binding process and the schemes with logic symbols and the assignment of the chemicals to each of these inputs corresponding to Figure 3a, b, c in the text.

## 7. Conjugating the FNB with polymeric carbohydrates

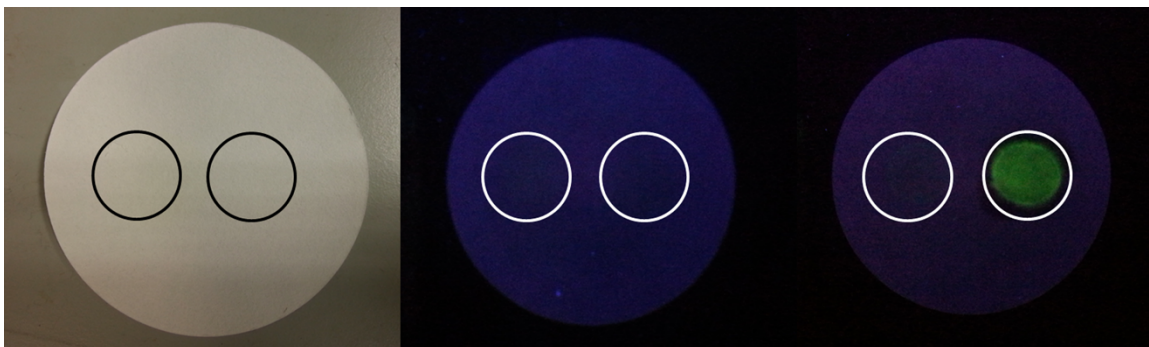

**Figure S8.** The photos were taken under day light and UV<sub>365</sub>. a) Two drops of 10  $\mu$ L FNB solution were dropped on filter paper in the black circle; b) No fluorescence can be seen under UV in the white circles; c) After dropping 10  $\mu$ L Fe<sup>3+</sup> solution on the right spot, green fluorescence can be seen under UV in the right circle.

**8. Fluorescent test of FNB for  $\text{Fe}^{3+}$ ,  $\text{F}^-$  and L-Ascorbic acid Sodium salt (LAS)**

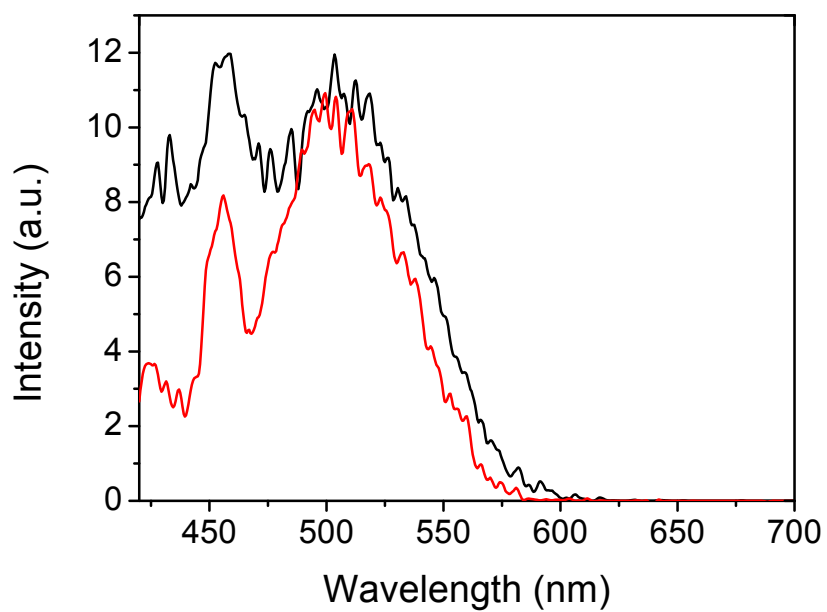

**Figure S9.** Fluorescent spectra of **FNB** (THF, 10  $\mu\text{M}$ ,  $\lambda_{\text{ex}} = 403$  nm) and FNB in the presence of 10  $\mu\text{M}$   $\text{F}^-$ , 10  $\mu\text{M}$   $\text{Fe}^{3+}$  and 20  $\mu\text{M}$  LAS.

## 9. pH titration of FNB

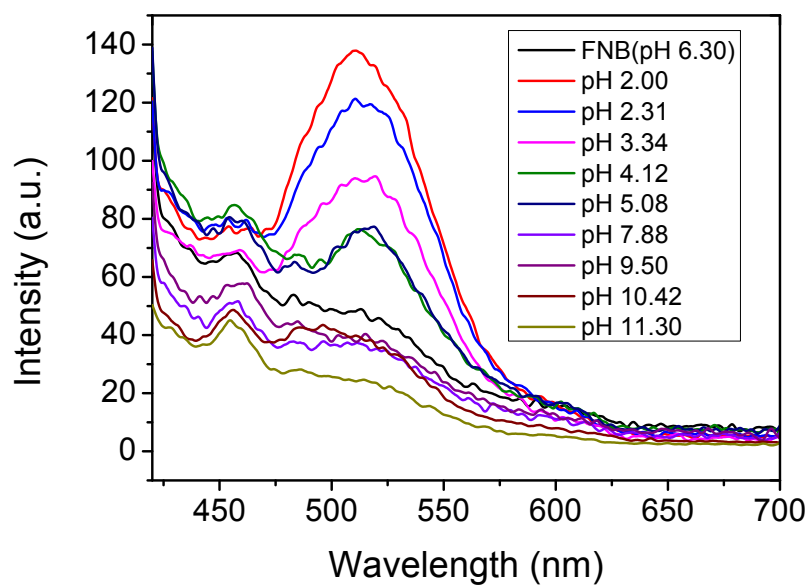

**Figure S10.** Fluorescent spectra of **FNB** (containing 52.1% methanol with 0.05 M NaCl in water solution, 10  $\mu$ M,  $\lambda_{\text{ex}} = 403$  nm) at different pH.

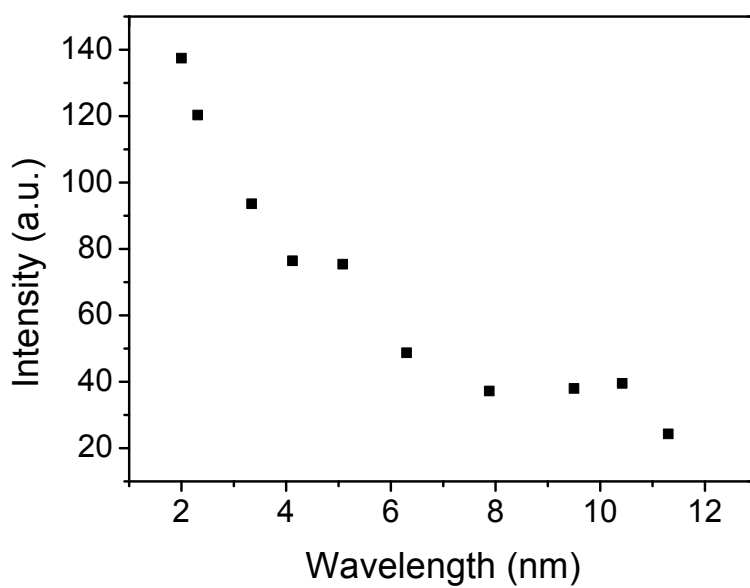

**Figure S11.** The values of intensity at 512 nm at different pH.

## 10. pH titration of FNB with 50 mM fructose

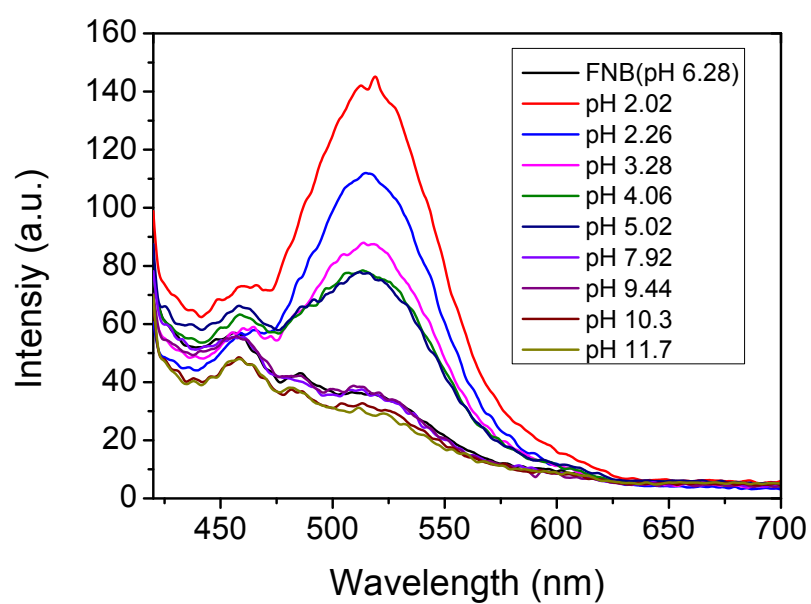

**Figure S12.** Fluorescent spectra of **FNB** (containing 52.1% methanol with 0.05 M NaCl in water solution, 10  $\mu$ M,  $\lambda_{\text{ex}} = 403$  nm) with 50 mM fructose at different pH.

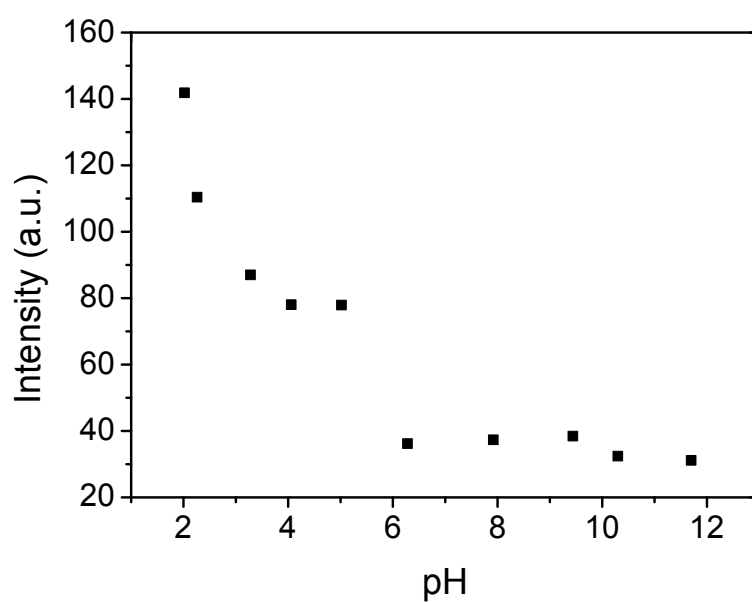

**Figure S13.** The values of intensity at 512 nm at different pH.

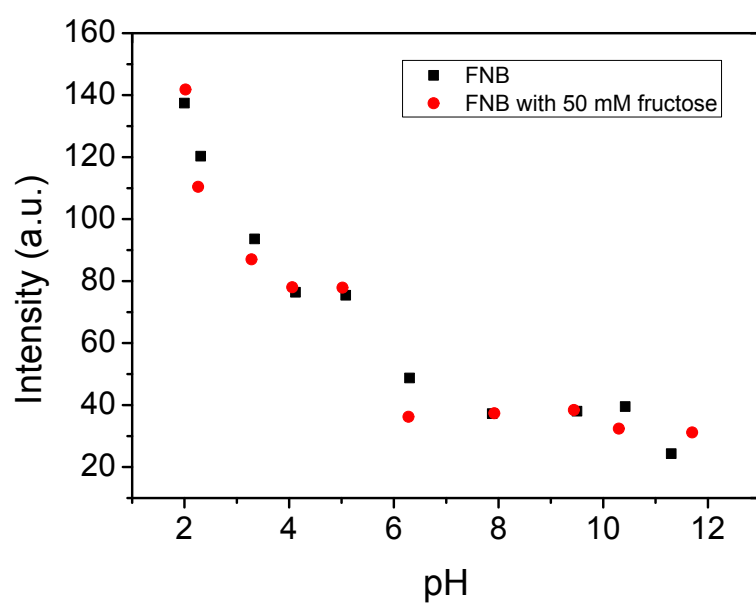

**Figure S14.** The Comparison of pH titrations of FNB without and with 50 mM fructose.

## 11. Electrochemical studies on detection of fluoride

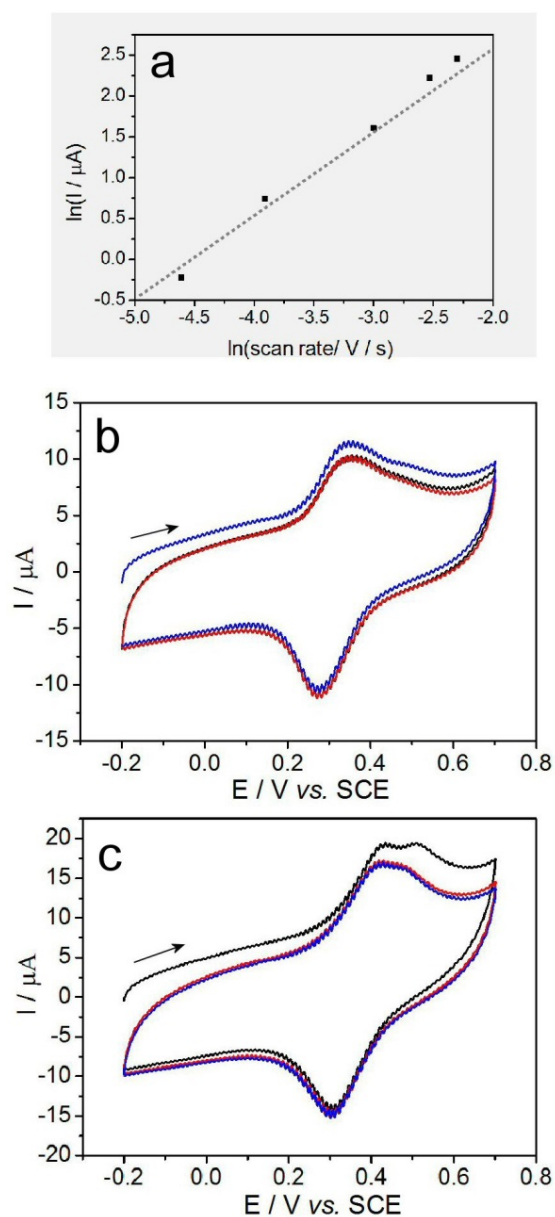

**Figure S15.** a) Plot of current peaks versus scan rates (10, 20, 50, 80, 100  $\text{mV s}^{-1}$ ) for 0.36  $\mu\text{g}$  FNB immobilised at a graphite electrode surface and immersed in 0.1 M  $\text{NaClO}_4$ ; b) First three scans of cyclic voltammograms (scan rate 50  $\text{mV s}^{-1}$ ) for 0.36  $\mu\text{g}$  FNB immobilised at graphite electrode and immersed in 0.1 M  $\text{NaClO}_4$ ; c) First three scans of cyclic voltammograms (scan rate 50  $\text{mV s}^{-1}$ ) for 0.36  $\mu\text{g}$  FNB immobilised at graphite electrode and immersed in 0.1 M  $\text{NaClO}_4$  with the addition of 0.1 M  $\text{NaF}$ .

## 12. Electrochemical studies on different anions

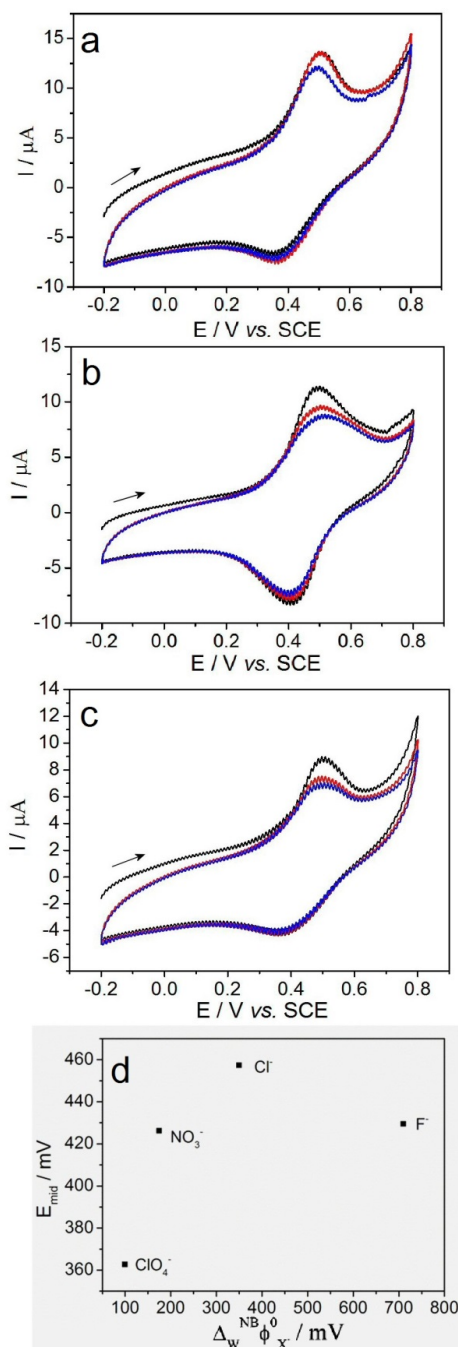

**Figure S16.** a)-c) First three scans of cyclic voltammograms (scan rate 50 mV s<sup>-1</sup>) for 0.36  $\mu\text{g}$  FNB immobilised at graphite electrode and immersed in 0.1 M NaNO<sub>3</sub>, NaCl, NaF solutions; d) Plot of formal potentials of the first oxidation step for FNB in the presence of different electrolyte anions versus the standard membrane potentials.



### 13. $^1\text{H}$ NMR and $^{13}\text{C}$ NMR spectra

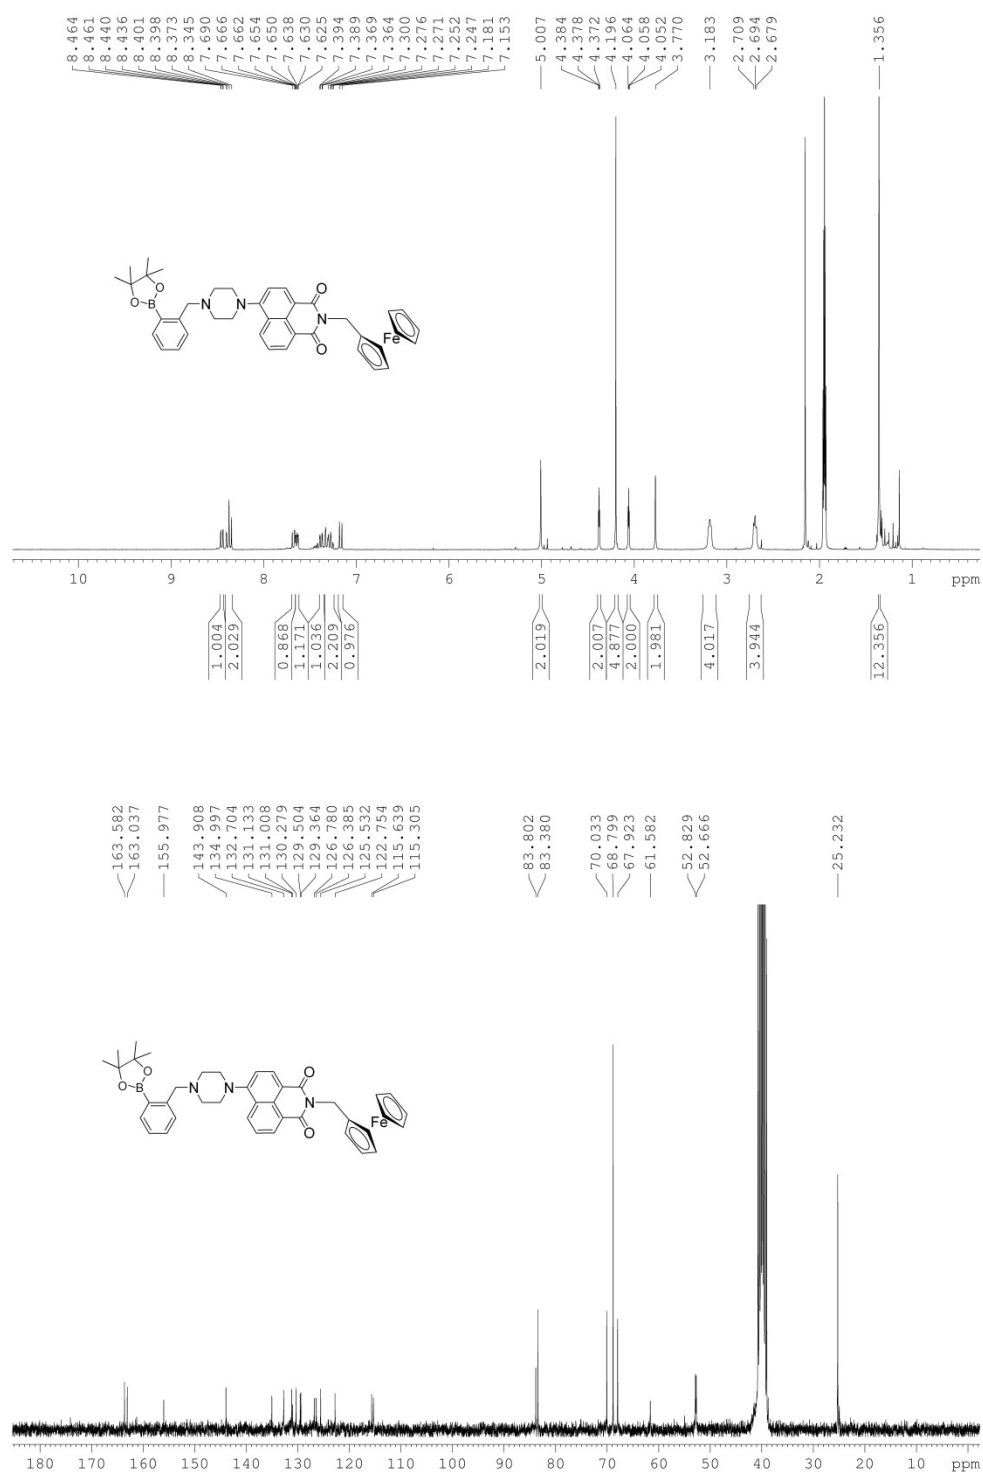

Figure S17.  $^1\text{H}$  NMR and  $^{13}\text{C}$  NMR spectra of FNB
